# Supplementary material for: Differential expression of Lp-PLA2 in obesity and type 2 diabetes and the influence of lipids
Source: PubMed Central journal article supplement (PMC6449000; doi:10.1007/s00125-018-4558-6), 2018-02-09
Supplement: 125_2018_4558_MOESM1_ESM.pdf [file 125_2018_4558_MOESM1_ESM.pdf]

ESM Fig. 1

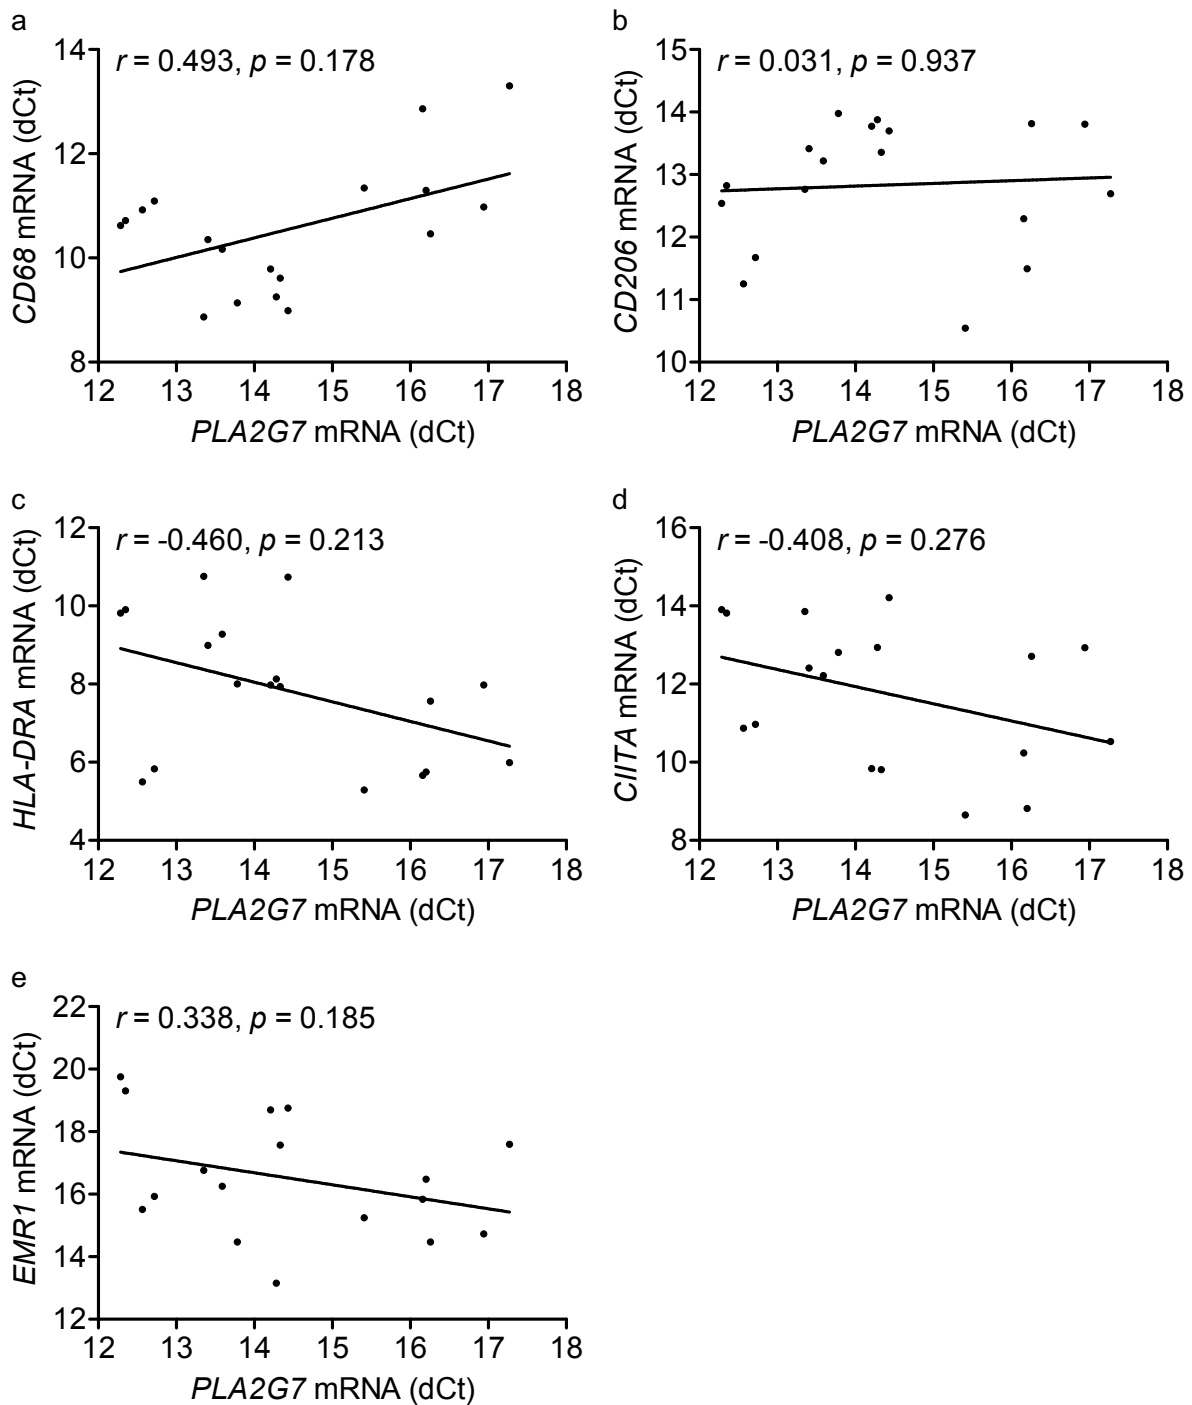

Correlations in SVF and mature adipocytes between *PLA2G7* and **(a)** *CD68*, **(b)** *CD206*, **(c)** *HLA-DRA*, **(d)** *CIITA*, **(e)** *EMR1*. Correlation analysis was performed using Pearson's correlation analysis, followed by two-way ANOVA.  $p < 0.05$  was considered significant.
